# Supplementary material for: Synthesis and characterization of poly(N-vinyl-1,2,3-triazole)s derived from monomers obtained by highly efficient Wolff's cyclocondensation
Source: Royal Society of Chemistry journal article supplement (doi:10.1039/c6py00147e), 2016-01-01

**Synthesis and characterization of poly (*N*-vinyl-1,2,3-triazole)s  
derived from monomers obtained by highly efficient Wolff's  
cyclocondensation**

Zikun Wang,<sup>a</sup> Youhua Tao,<sup>b</sup> Zhen Wang,<sup>c</sup> and Jingling Yan\*<sup>a</sup>

<sup>a</sup> Laboratory of Polymer Composites Engineering, <sup>b</sup> Key Laboratory of Polymer Ecomaterials, <sup>c</sup> State Key Laboratory of Polymer Physics and Chemistry, Changchun Institute of Applied Chemistry, Chinese Academy of Sciences, Changchun, 130022, China.

E-mail: [jyan@ciac.ac.cn](mailto:jyan@ciac.ac.cn)

## NMR spectra of 1a and 2a

1a-H

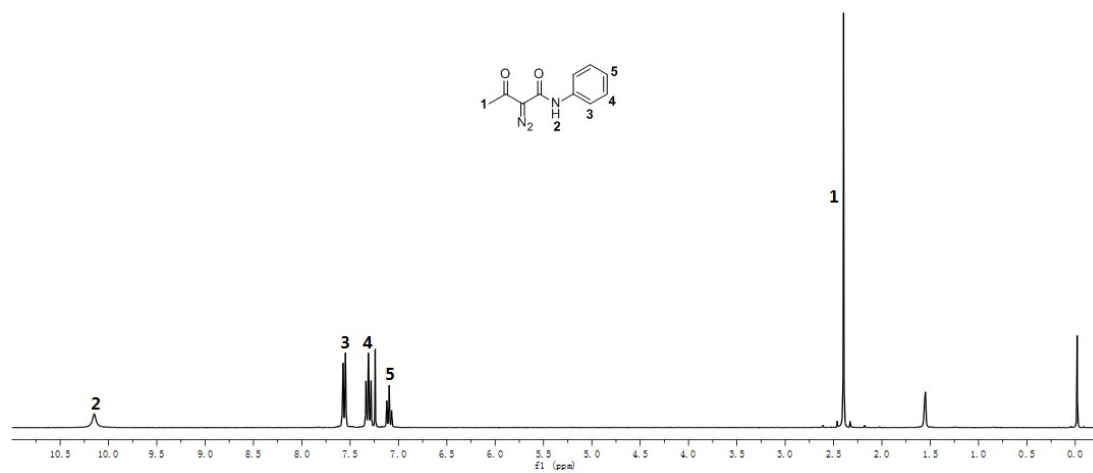

1a-C

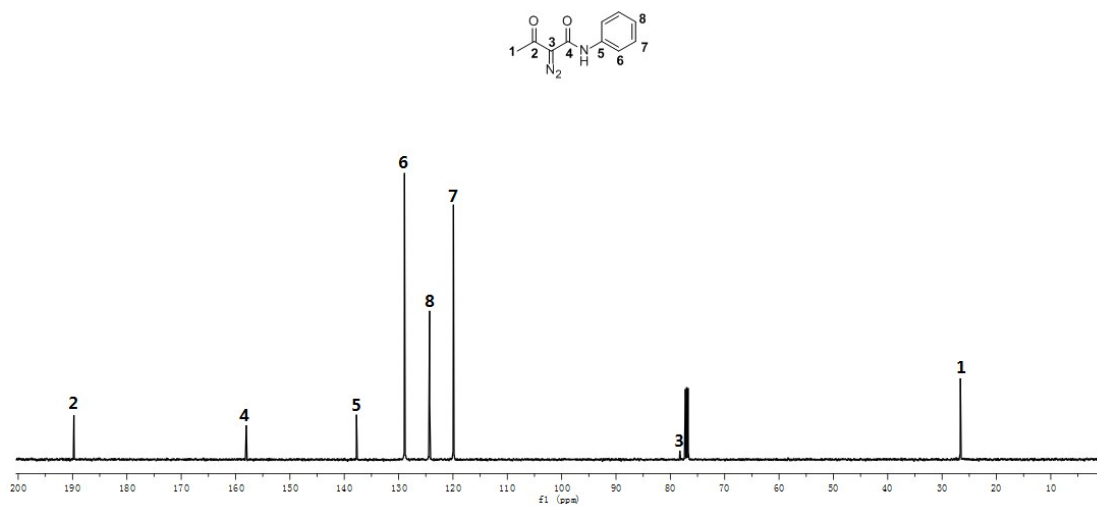

2a-H

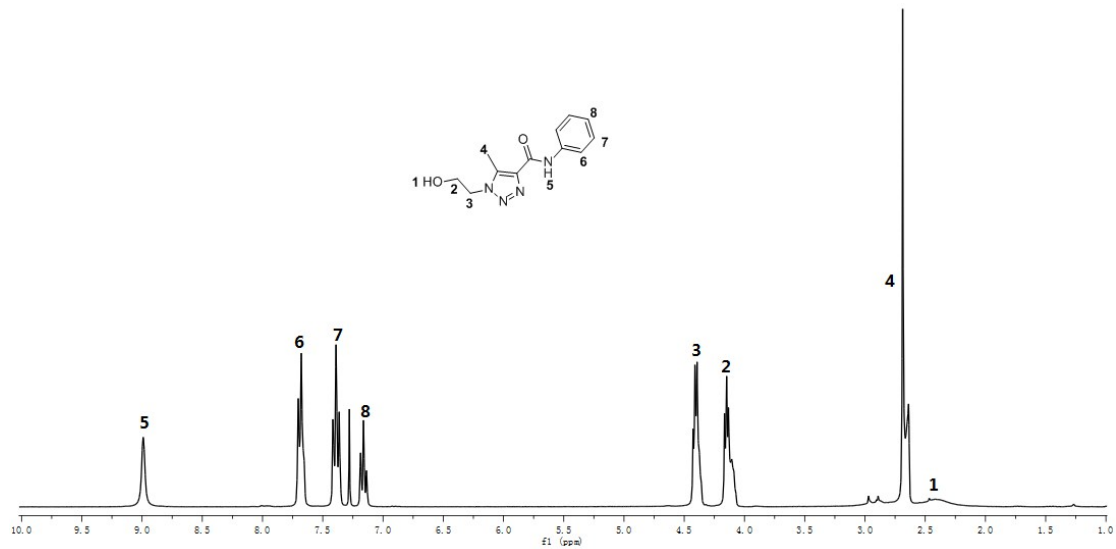

2a-C

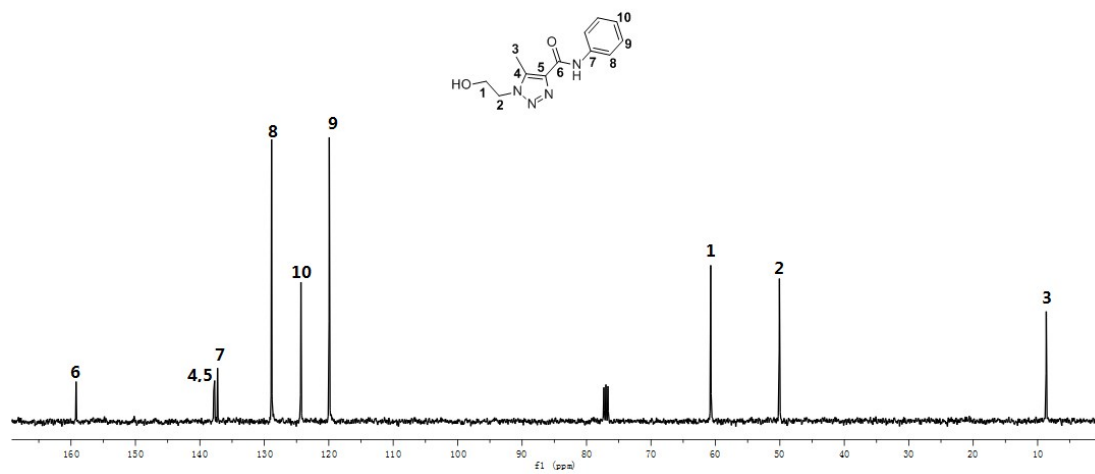

Supplement: c6py00147e1.pdf [file c6py00147e1.pdf]
